# Supplementary material
Source: PubMed Central journal article supplement (PMC2600427)
Supplement: NIHMS3205-supplement-1.pdf [file NIHMS3205-supplement-1.pdf]

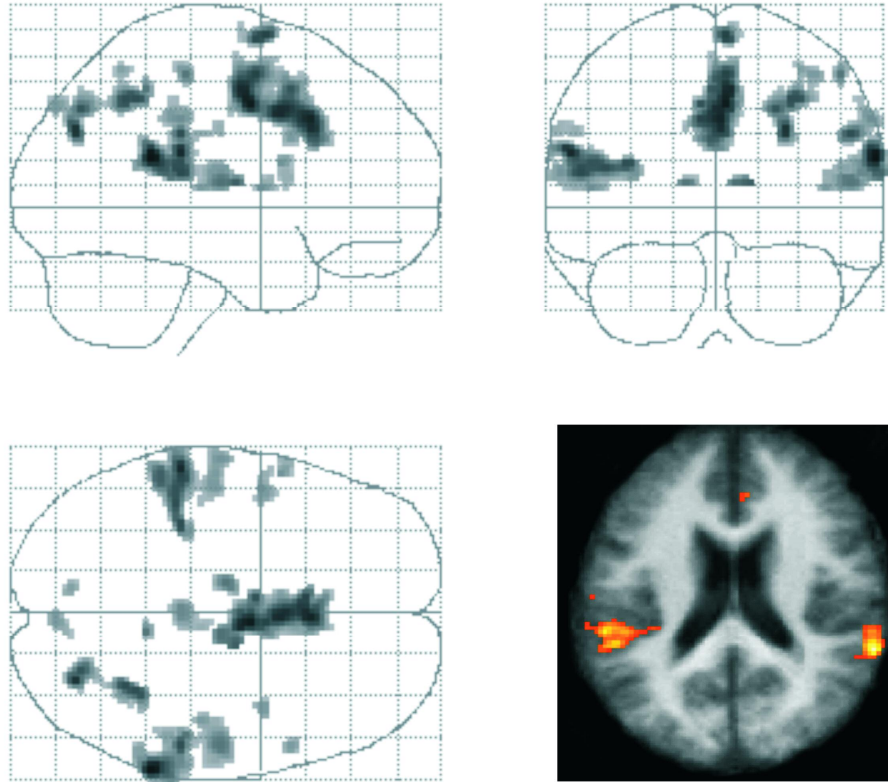

**fMRI main effects for TMS, irrespective of task. Results of the group random effects analysis are projected onto a transparent schematic of the MNI template brain and on a transverse section ( $z=20$ ) of the averaged normalized structural scans of all participants. The height threshold for the resulting SPM $\{t\}$ s was set at  $T > 4$ , uncorrected for multiple comparisons across whole brain, and the extent (or cluster) threshold set at  $P < 0.05$ , corrected for multiple comparisons across whole brain.**
